# Supplementary material
Source: PubMed Central journal article supplement (PMC5860148)
Supplement: kwx118whitewebmaterialfinal.pdf [file kwx118whitewebmaterialfinal.pdf]

## WEB MATERIAL

### **“Lifetime Alcohol Intake, Binge Drinking Behaviors, and Breast Cancer Risk”**

Alexandra J. White<sup>1\*</sup>, Lisa A. DeRoo<sup>1,3</sup>, Clarice R. Weinberg<sup>2</sup>, and Dale P. Sandler<sup>1</sup>

Author affiliations: <sup>1</sup> Epidemiology Branch, National Institute of Environmental Health Sciences, NIH, Research Triangle Park, NC; <sup>2</sup> Biostatistics Branch, National Institute of Environmental Health Sciences, NIH, Research Triangle Park, NC; <sup>3</sup> Department of Global Public Health and Primary Care, University of Bergen, Bergen, Norway.

**\*Corresponding author:** Dr. Alexandra J. White, Epidemiology Branch, National Institute of Environmental Health Sciences, Research Triangle Park, NC, 27709-2233.

Telephone: (919) 316-4867; Fax: (301) 480-3290; E-mail: alexandra.white@nih.gov.

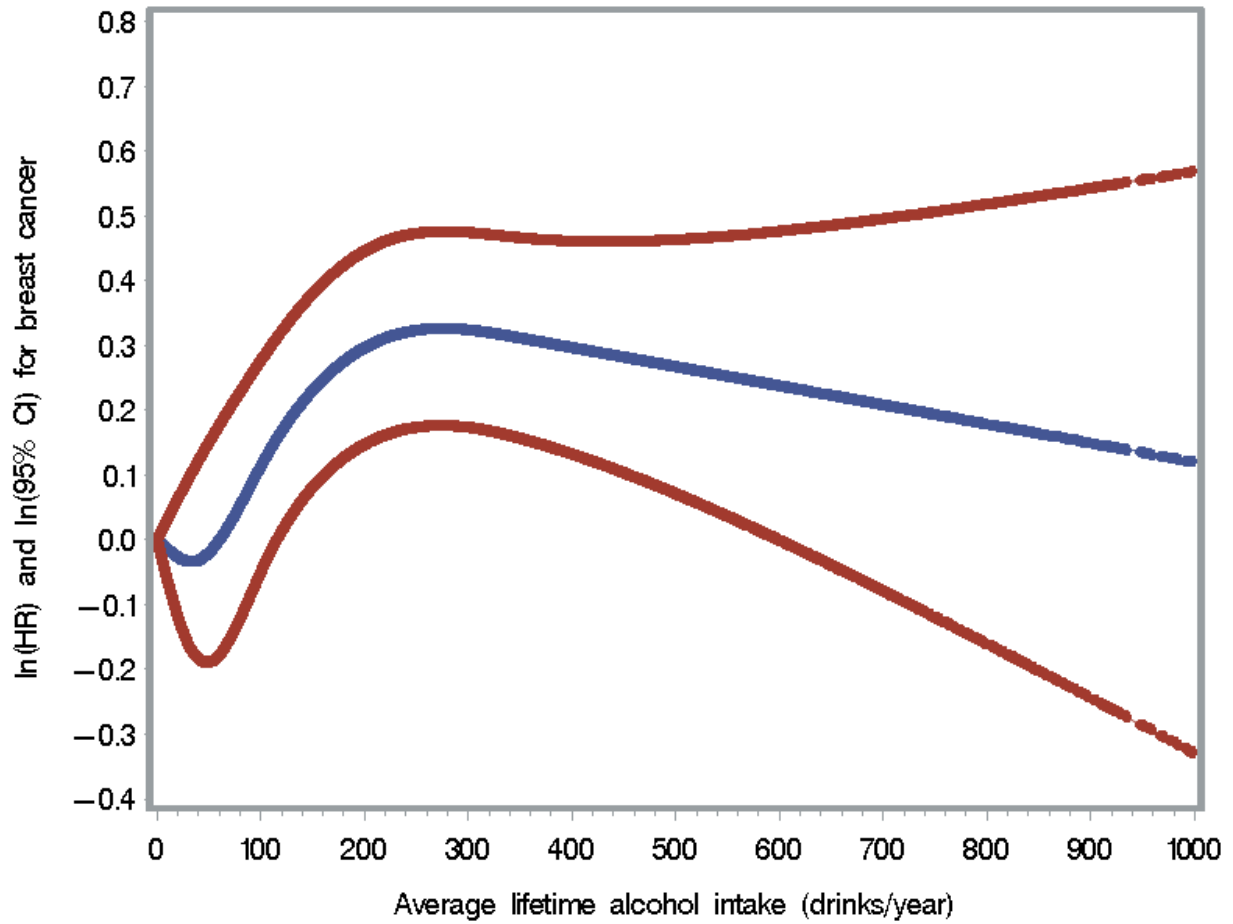

**Web Figure 1.** Restricted cubic splines, with 4 knots (5%, 35%, 65%, 95%), modeling the association between average lifetime alcohol intake (drinks/year) and invasive breast cancer risk, Sister Study, 2003–2014. CI, confidence interval; HR, hazard ratio.

**Web Table 1.** Association of Average Lifetime Alcohol Intake With DCIS, ER Tumor Status, and Menopausal Status at Diagnosis, Sister Study, 2003–2014<sup>a</sup>

| Tumor Characteristic                        | Average Lifetime Alcohol Consumption |      |                    |      |            |                  |      |            |
|---------------------------------------------|--------------------------------------|------|--------------------|------|------------|------------------|------|------------|
|                                             | <60 Drinks/Year                      |      | 60–229 Drinks/Year |      |            | ≥230 Drinks/Year |      |            |
|                                             | No.                                  | HR   | No.                | HR   | 95% CI     | No.              | HR   | 95% CI     |
| DCIS                                        | 213                                  | 1.00 | 167                | 0.98 | 0.79, 1.21 | 55               | 0.99 | 0.72, 1.35 |
| ER status <sup>b,c</sup>                    |                                      |      |                    |      |            |                  |      |            |
| ER+                                         | 503                                  | 1.00 | 447                | 1.18 | 1.04, 1.35 | 186              | 1.42 | 1.19, 1.70 |
| ER–                                         | 104                                  | 1.00 | 84                 | 1.09 | 0.81, 1.46 | 24               | 0.96 | 0.60, 1.53 |
| Menopausal status at diagnosis <sup>b</sup> |                                      |      |                    |      |            |                  |      |            |
| Premenopausal                               | 131                                  | 1.00 | 149                | 1.30 | 1.02, 1.66 | 50               | 1.45 | 1.03, 2.06 |
| Postmenopausal                              | 535                                  | 1.00 | 468                | 1.17 | 1.03, 1.34 | 179              | 1.36 | 1.13, 1.63 |

Abbreviations: BMI, body mass index; CI, confidence interval; DCIS, ductal carcinoma in situ; ER, estrogen receptor; HR, hazard ratio.

<sup>a</sup> HRs were adjusted for age, race, education, age at menarche, age at first birth, parity, use of hormonal birth control, alcohol intake, use of postmenopausal hormones, age at menopause and menopausal status, and BMI.

<sup>b</sup> ER status and menopausal status at diagnosis were limited to invasive cases.

<sup>c</sup> Case-case analysis:  $P = 0.7$ .

**Web Table 2.** Ever Binge Drinking Relative to Low Lifetime Alcohol Intake in Association With DCIS, ER Tumor Status, and Menopausal Status at Diagnosis, Sister Study, 2003–2014<sup>a</sup>

| Tumor Characteristic                        | Ever Binge Drinking |      |              |      |            |
|---------------------------------------------|---------------------|------|--------------|------|------------|
|                                             | Low Alcohol Intake  |      | Ever Binging |      |            |
|                                             | No.                 | HR   | No.          | HR   | 95% CI     |
| DCIS                                        | 213                 | 1.00 | 168          | 0.98 | 0.79, 1.22 |
| ER status <sup>b,c</sup>                    |                     |      |              |      |            |
| ER+                                         | 503                 | 1.00 | 531          | 1.32 | 1.16, 1.51 |
| ER–                                         | 104                 | 1.00 | 84           | 1.07 | 0.79, 1.46 |
| Menopausal status at diagnosis <sup>c</sup> |                     |      |              |      |            |
| Premenopausal                               | 131                 | 1.00 | 183          | 1.38 | 1.09, 1.76 |
| Postmenopausal                              | 535                 | 1.00 | 485          | 1.28 | 1.12, 1.47 |

Abbreviations: BMI, body mass index; CI, confidence interval; DCIS, ductal carcinoma in situ; ER, estrogen receptor; HR, hazard ratio.

<sup>a</sup> HRs were adjusted for age, race, education, age at menarche, age at first birth, parity, use of hormonal birth control, alcohol intake, use of postmenopausal hormones, age at menopause and menopausal status, and BMI.

<sup>b</sup> ER status and menopausal status at diagnosis were limited to invasive cases.

<sup>c</sup> Case-case analysis:  $P = 0.5$ .
